# Supplementary material for: Dynamics of Influenza A and SARS-CoV-2 coinfections during the COVID-19 pandemic in India
Source: medRxiv preprint, doi:10.1101/2023.02.19.23285730, version 1 (2023-02-22)

**Monthwise SARS-CoV-2 Variant Distribution in SARS-CoV-2-H1N1pdm09 (n=168) and SARS-CoV-2-Influenza A (n=79) Coinfection Cases**

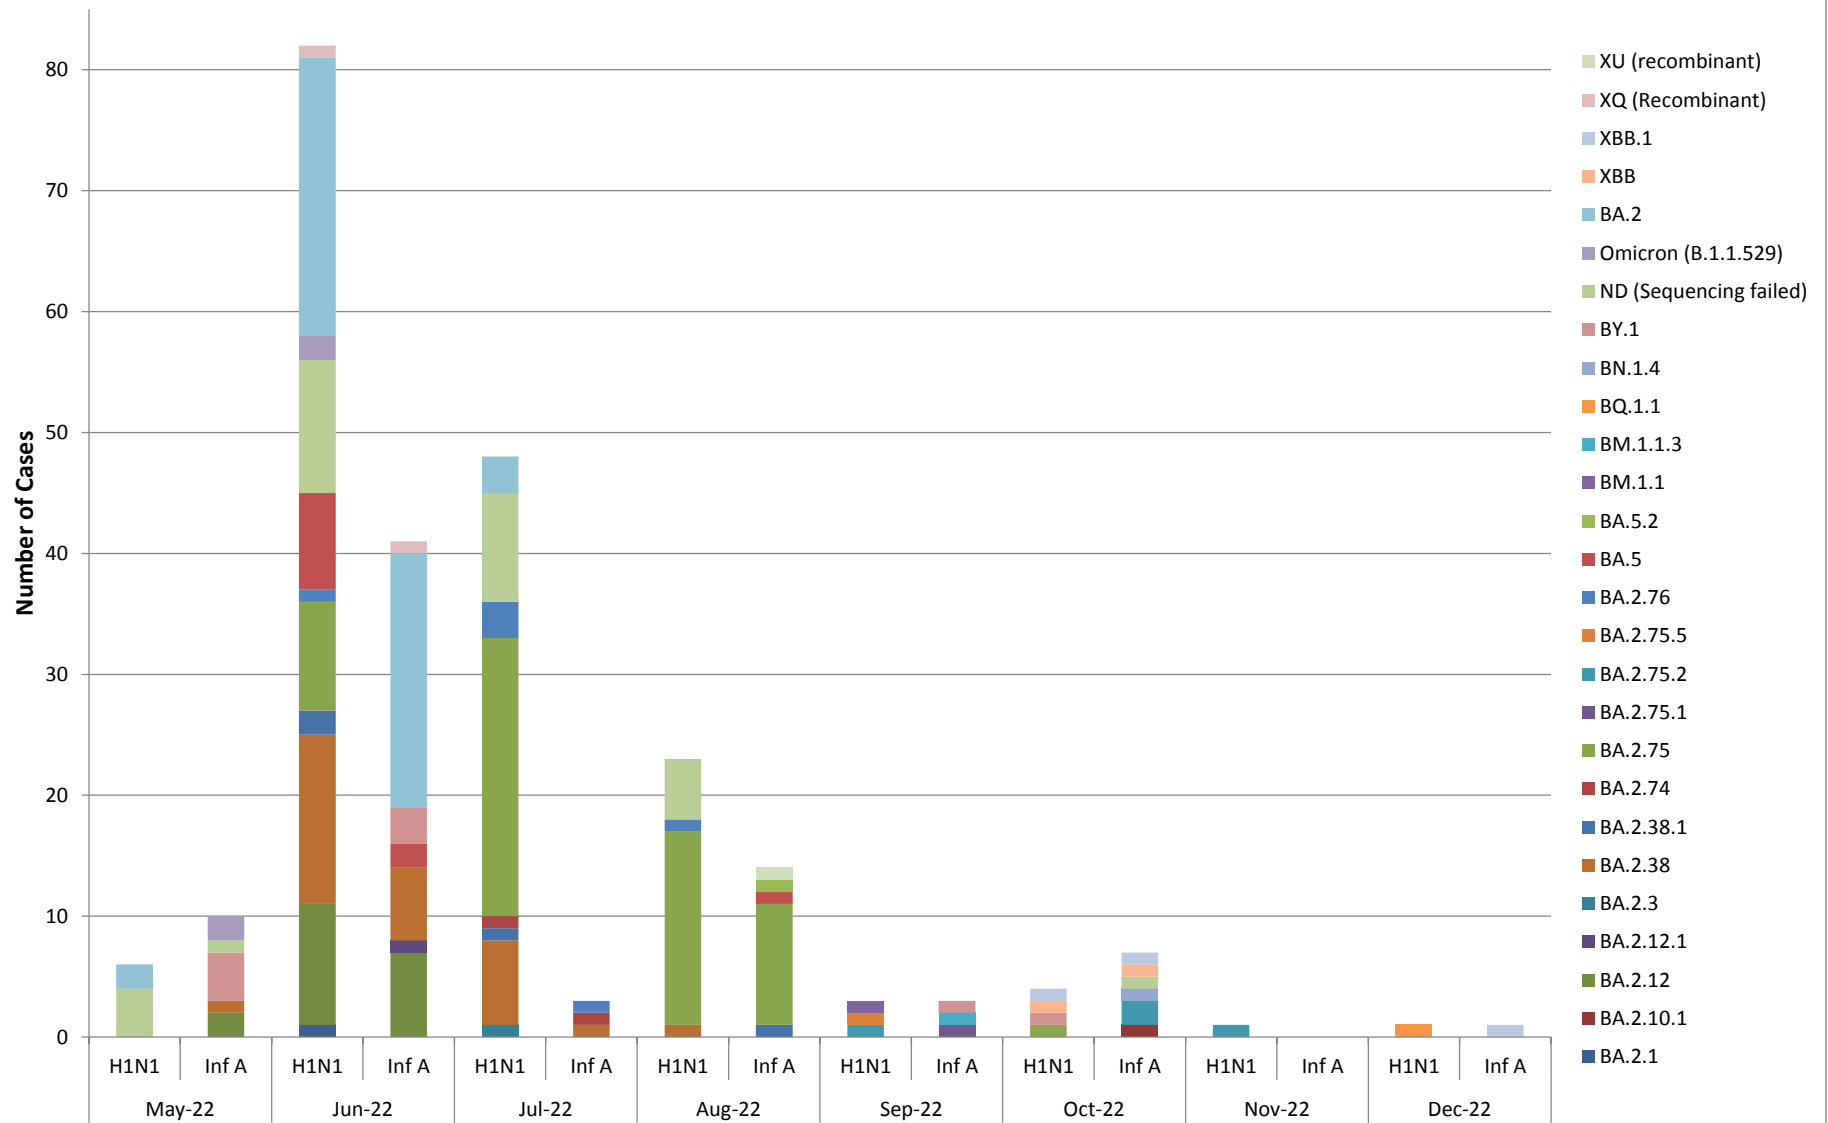

Supplement: Supplementary Figure 1 [file 285730_file12.pdf]
