# Supplementary material for: Dynamics of Influenza A and SARS-CoV-2 coinfections during the COVID-19 pandemic in India
Source: medRxiv preprint, doi:10.1101/2023.02.19.23285730, version 1 (2023-02-22)
Supplement: Supplementary Figure 3 [file 285730_file14.pdf]

Number of Cases

May-22 Jun-22 Jul-22 Aug-22 Sep-22 Oct-22 Nov-22 Dec-22

BA.2.1 BA.2.4 BA.2.75.6 BA.5.2.1 BA.1.1.3 Omicron BA.2.10 BA.2.56 BA.2.74 BA.2.75.7 BF.3 BM.4.1.1 Omicron BA.2 BA.2.12.1 BA.2.75 BA.5 BL.1 BL.2 BN.1 BN.2 XAH (recombinant) XBB BA.2.38 BA.2.38.1 BA.2.75.2 BA.5.1.1 BL.3 BR.1 XBB.1 BA.2.38.2 BA.2.75.5 BA.5.2 BL.4 BM.1.1 ND (Sequencing failed) XBB.2
