# Supplementary material for: Dynamics of Influenza A and SARS-CoV-2 coinfections during the COVID-19 pandemic in India
Source: bioRxiv or medRxiv preprint supplement (doi:10.1101/2023.02.19.23285730), 2023-02-22

**Percentage Distribution of SARS-CoV-2 Variants in SARS-CoV-2-H1N1pdm09 (n=168) and SARS-CoV-2-Influenza A (n=79) Coinfection Cases**

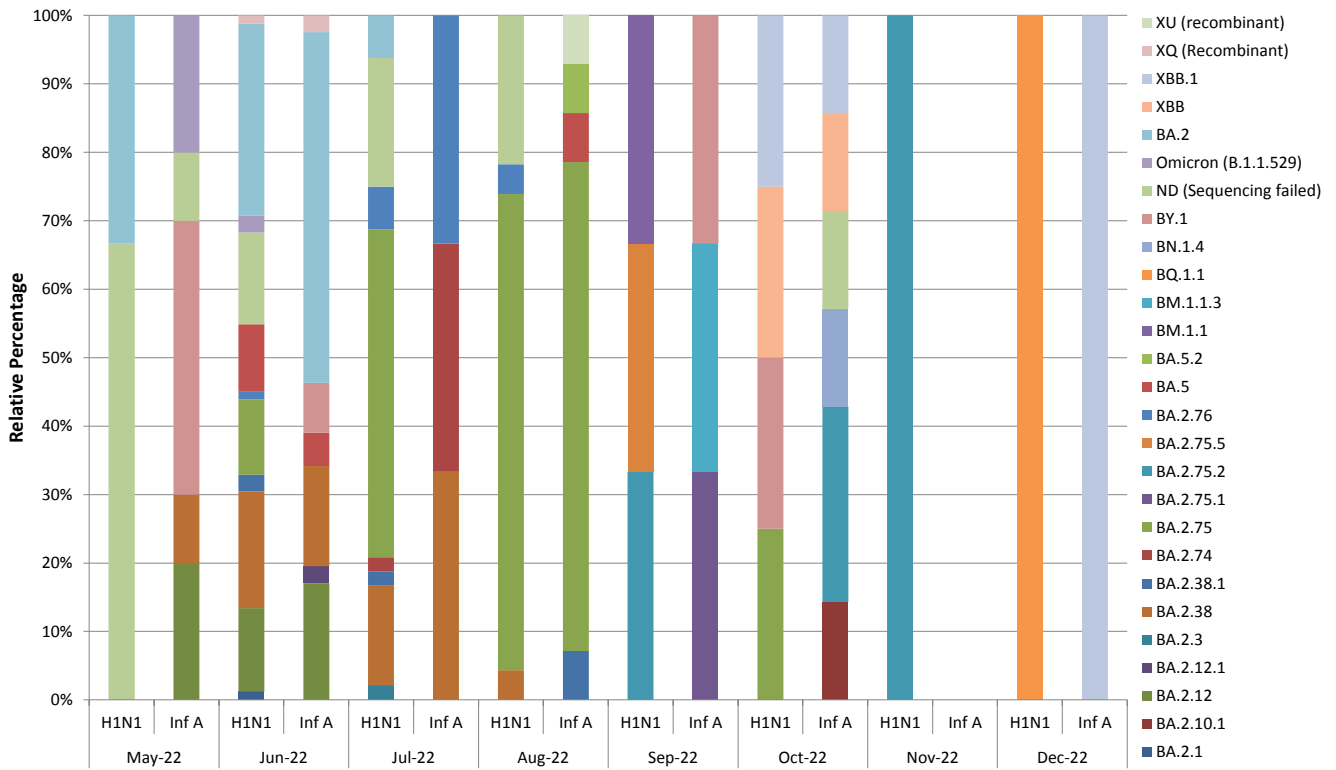

Supplement: Supplementary file [file media-2.pdf]
